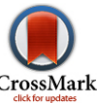

## Correction

# Correction: Signaling Role of Prokineticin 2 on the Estrous Cycle of Female Mice

The *PLOS ONE* Staff

Figures 2, 5, 6, and 7 are in the incorrect order. The publisher apologizes for these errors. The figure legends are correct. The correct versions of Figures 2, 5, 6, and 7 can be viewed here.

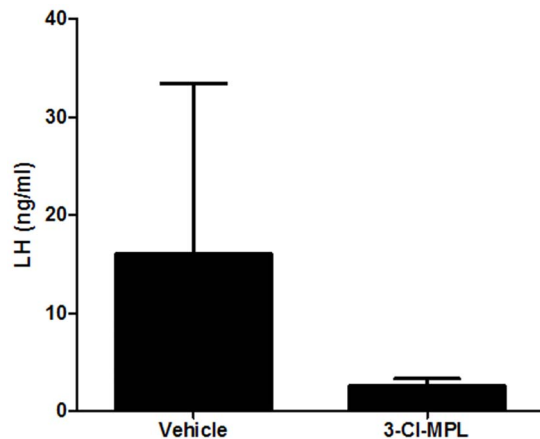

**Figure 2. PKR2 antagonist reduced plasma LH levels (Mean  $\pm$  S.E.).** The LH levels in the PKR2 antagonist (10 mg/kg 3CI-MPL) group were significantly reduced compared to the vehicle treatment ( $n = 6$  for each group,  $p < 0.01$ ).  
doi:10.1371/journal.pone.0090860.g002

**Citation:** The *PLOS ONE* Staff (2014) Correction: Signaling Role of Prokineticin 2 on the Estrous Cycle of Female Mice. *PLoS ONE* 9(5): e98314. doi:10.1371/journal.pone.0098314

**Published:** May 15, 2014

**Copyright:** © 2014 The *PLOS ONE* Staff. This is an open-access article distributed under the terms of the Creative Commons Attribution License, which permits unrestricted use, distribution, and reproduction in any medium, provided the original author and source are credited.

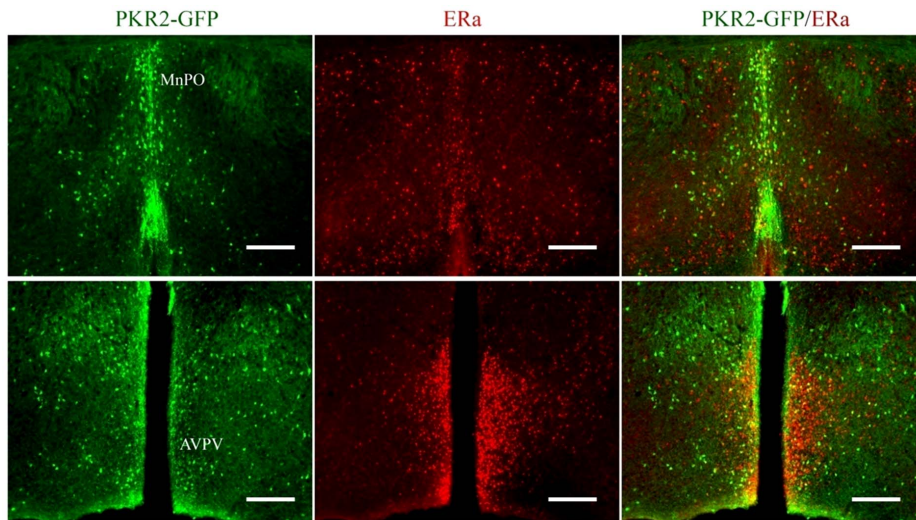

**Figure 5. The coexpression of PKR2 and ER $\alpha$  in the preoptic area. PKR2 and ER $\alpha$  were detected by immunofluorescence staining.** PKR2-GFP expression was shown in green and ER $\alpha$  expression was shown in red. Yellow or orange color in the MnPO and AVPV regions indicates likely co-expression of PKR2 and ER $\alpha$  (scale bars:100  $\mu$ m).  
doi:10.1371/journal.pone.0090860.g005

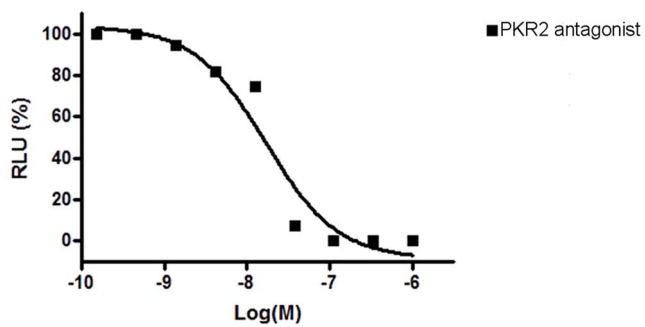

**Figure 6. Potency of PKR2 antagonist, 3CI-MPL, in antagonizing PKR2.** Antagonist potency was examined in Chinese Hamster Ovary (CHO) cells that stably express PKR2. RLU is an index for calcium influx measurement with a luminescence-based assay. The IC<sub>50</sub> of 3CI-MPL for PKR2 were 24.9 $\pm$ 4.3 nM(Mean  $\pm$  S.E.). Shown was representative of three independent experiments.  
doi:10.1371/journal.pone.0090860.g006

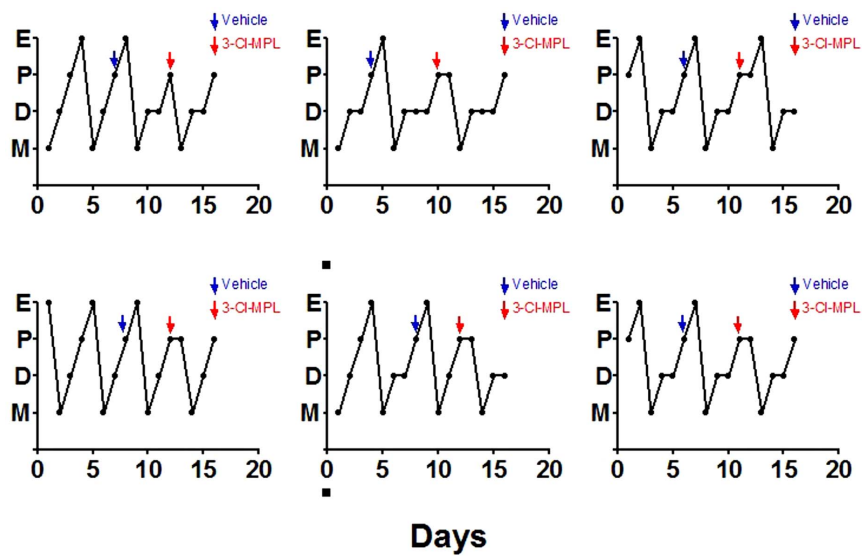

**Figure 7. Blocking of estrous cycle by PKR2 antagonist treatment.** The administration of 3Cl-MPL (shown in red arrows) prevented the progression to estrous stage. Vehicle treatment was shown by blue arrows. E: estrus, P: proestrus, D: diestrus, M: metestrus. doi:10.1371/journal.pone.0090860.g007

## Reference

1. Xiao L, Zhang C, Li X, Gong S, Hu R, et al. (2014) Signaling Role of Prokineticin 2 on the Estrous Cycle of Female Mice. PLoS ONE 9(3): e90860. doi:10.1371/journal.pone.0090860
